# Supplementary material
Source: publisher figshare collection journal article supplement (https://acs.figshare.com/ndownloader/files/34106258)
Supplement: Supplementary file 1 [file 34106258]

**Supporting Information for**

**Phosphorylated protein level in animal-sourced food muscles based  
on Fe<sup>3+</sup> and UV/vis spectrometry**

Rong Cui, Mingke Shao, Hongyan Bi\*

College of Food Science and Engineering, Shanghai Ocean University, Hucheng Ring  
Road 999, Pudong New District, 201306 Shanghai, China

\*, To whom correspondence should be addressed. Tel.: +86-21-61900364; Fax:

+86-21-61900365; E-mail address: hybi@shou.edu.cn

E-mail addresses for the other authors: RongCuipink@163.com (R Cui);

shaomingke\_1015@163.com (M Shao)

### **S1. The concentrations of solutions in Figure 1**

As shown in Figure 1A, in the case of phosphopeptide (P-pep), the concentration of phosphopeptide is 0.25 mg/mL and the concentration of ferric ion solution is 0.1 mM. The blue dashed curve is the algebraic addition of UV/vis spectrum of 0.1 mM Fe (III) and UV/vis spectrum of 0.25 mg/mL phosphopeptide (P-pep) (c). The black solid curve is the UV/vis spectrum obtained from the mix of 0.2 mM Fe(III) and 0.5 mg/mL P-pep (d). As shown in Fig. 1B, the concentration of Angiotensin I, a non-phosphopeptide model, is 0.25 mg/mL, and the concentration of ferric ion solution is 0.1 mM. The blue dashed curve is calculated by adding the UV/vis spectrum of 0.1 mM Fe (III) and the UV/vis spectrum of 0.25 mg/mL P-pep together (c). The black solid curve is the UV/vis spectrum obtained from mixing the solutions of 0.2 mM Fe (III) and 0.5 mg/mL of Angiotensin I (d).

## S2. The information of fish samples analyzed in the present study

**Table S1.** The size, weight, trader and probable origin of the fish samples analyzed in the present study.

| common name          | species                            | trader                     | place of purchase (probable origin) | size/cm  | weight/g   |
|----------------------|------------------------------------|----------------------------|-------------------------------------|----------|------------|
| large yellow croaker | <i>Larimichthys crocea</i> (LC)    | Xianwaixian flagship store | Ningbo, Zhejiang Province           | 26.6±5.8 | 317.5±17.5 |
| small yellow croaker | <i>Larimichthys polyactis</i> (LP) | Yulang flagship store      | Qingdao, Shandong Province          | 17.7±1.2 | 67.5±7.5   |
